# ANESTHESIOLOGY

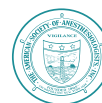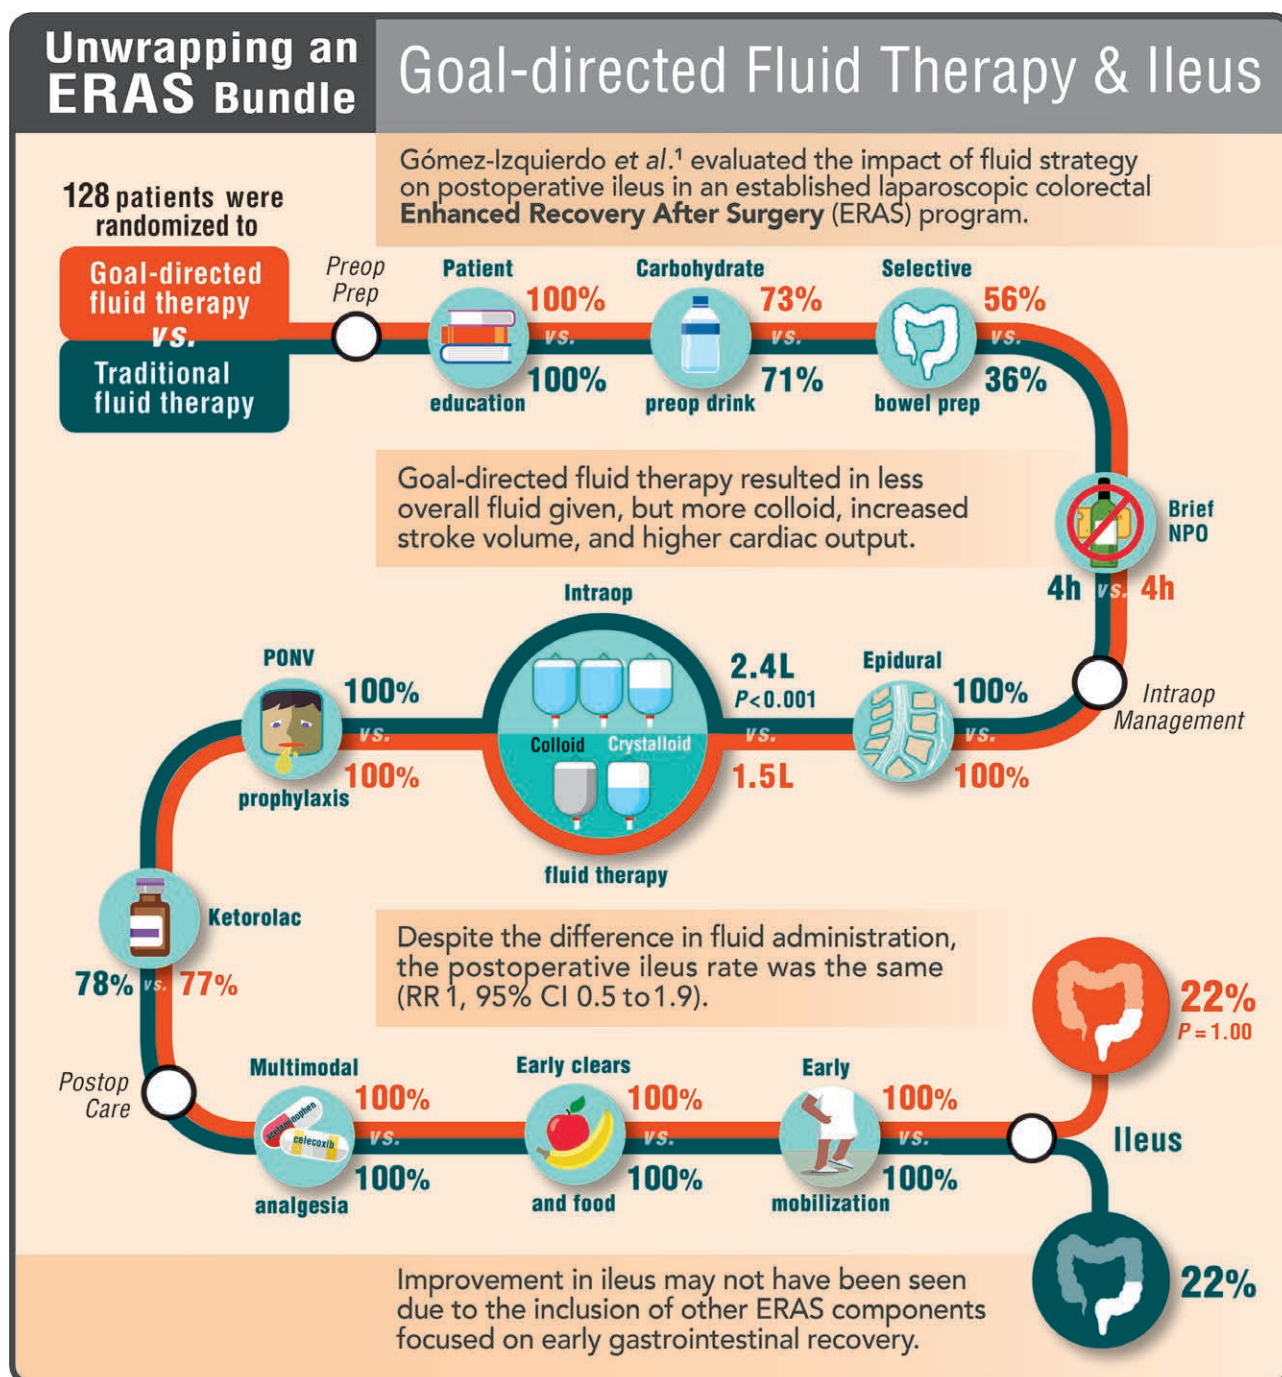

Intraop = intraoperative; NPO = *non per os*; PONV = postoperative nausea and vomiting; Postop = postoperative; Preop = preoperative; RR = risk ratio.

Infographic created by Jonathan P. Wanderer, Vanderbilt University Medical Center, and James P. Rathmell, Brigham and Women's Health Care/Harvard Medical School; illustration by Annemarie Johnson, Vivo Visuals. Address correspondence to Dr. Wanderer: jonathan.p.wanderer@vanderbilt.edu.

1. Gómez-Izquierdo JC, Trainito A, Mirzazandov D, Stein BL, Liberman S, Charlebois P, Pecorelli N, Feldman LS, Carli F, Baldini G: Goal-directed fluid therapy does not reduce primary postoperative ileus after elective laparoscopic colorectal surgery: A randomized controlled trial. *ANESTHESIOLOGY* 2017; 127:36-49
